# Supplementary material for: IL-17A in Human Liver: Significant Source of Inflammation and Trigger of Liver Fibrosis Initiation
Source: MDPI journal article supplement (doi:10.3390/ijms23179773), 2022-08-29

## Supplementary Tables

**Table S1: List of antibodies used in the study**

| Markers                       | Compagnies | labelling    | Clone    | Lot        |
|-------------------------------|------------|--------------|----------|------------|
| <b>CD45</b>                   | BD         | BUV805       | HI30     | 7205769    |
| <b>CD3</b>                    | BD         | PE-CF594     | UCHT1    | 9102751    |
| <b>CD4</b>                    | BD         | FITC         |          | 41807      |
| <b>CD8</b>                    | BD         | BV786        | RPA-T8   | 8149724    |
| <b>CD161</b>                  | BD         | PerCP        | HP-3G10  | B235672    |
| <b>CD196</b>                  | BD         | PE           |          | 2124684    |
| <b>CD56</b>                   | BD         | BUV395       | NCAM16.2 | 6055836    |
| <b>CD16</b>                   | BD         | PerCP-Cy5.5  | 3G8      | 2137566    |
| <b>TCRgd</b>                  | BD         | PE           |          | 41154      |
| <b>TCRValpha7.2</b>           | MACS       | APC          |          | 5190813035 |
| <b>HLA-DR</b>                 | BD         | BUV395       | G46-6    | 6119962    |
| <b>Live-DEAD</b>              | invitrogen | Violet dead  |          | 2116142    |
| <b>CD15</b>                   | BD         | BV711        | W6D3     | 9206724    |
| <b>CD14</b>                   | BD         | PE-Cy7       |          | 7250714    |
| <b>CD11b</b>                  | MACS       | PerCP-Vio700 | REA713   | 5180611205 |
| Intracellular                 |            |              |          |            |
| <b>IL-17A</b>                 | BD         | BV510        | BL168    | B262925    |
| <b>INF<math>\gamma</math></b> | BD         | BV650        | 4S.B3    | 9142880    |

**Tableau S2: List of Elisa kits used in the study**

| <u>Markers</u>  | <u>Compagnies</u> | <u>Catalog N</u> | <u>Lot</u> |
|-----------------|-------------------|------------------|------------|
| MMP-2           | RD systems        | DY902            | P218675    |
| TIMP-2          | RD systems        | DY971            | P182406    |
| MMP-9           | RD systems        | DY911-05         | P217702    |
| TGF-β1          | RD systems        | DY240            | P196660    |
| IL-6            | RD systems        | DY206-05         | P219259    |
| IL-22           | RD systems        | DY782-05         | P103191    |
| Pro-Collagen1A1 | RD systems        | DY6220_05        | P221260    |
| TIMP-1          | RD systems        | DY970-05         | P221002    |
| IL-17A          | RD systems        | DY317-05         | P100117    |

## Supplementary Figures

Figure S1

Negative control for intracellular cytokine production for IL-17A and INF $\gamma$

## Blood

FMO IL17A/ INF $\gamma$ 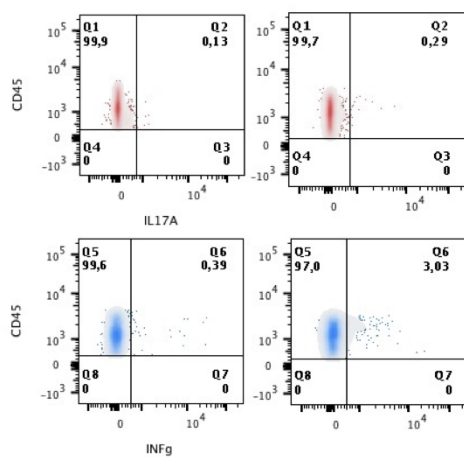

Liver

FMO IL17A/ INF $\gamma$ 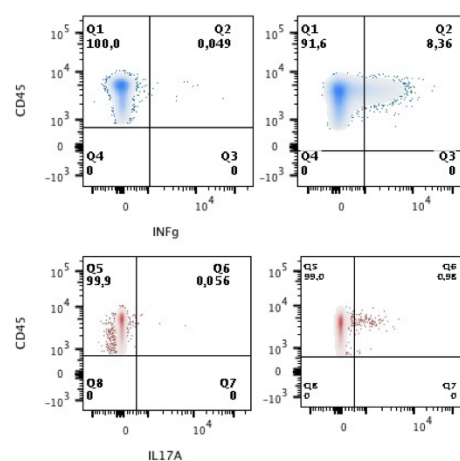

Supplement: s1 [file s1]
